# Supplementary material for: Flame retardation behavior of polybenzoxazine/α-ZrP nanocomposites
Source: Royal Society of Chemistry journal article supplement (doi:10.1039/c6ra18450b), 2016-01-01
Supplement: c6ra18450b1.pdf [file c6ra18450b1.pdf]

## Flame retardation behavior of polybenzoxazine/ $\alpha$ -ZrP nanocomposites

Chunxia Zhao, Peng Li, Da He, Yuntao Li\*, Fan Lei and Hung-Jue Sue\*\*

### Supporting Information

Thermogravimetric analysis (TG) was used to calculate the amount of real  $\alpha$ -ZrP nanosheets in exfoliated  $\alpha$ -ZrP gel. TG was carried out at a heating rate of 10 °C/min and a flow rate of 60 mL/min under nitrogen and held at 900 °C for 60min.

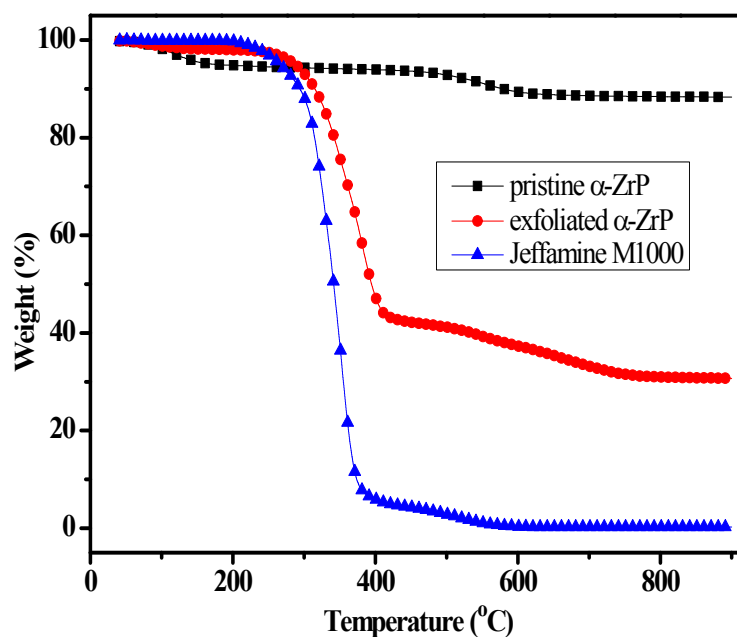

Fig.S1 TG curves of pristine  $\alpha$ -ZrP, exfoliated  $\alpha$ -ZrP and Jeffamine M1000 in nitrogen.

Jeffamine and  $\alpha$ -ZrP nanosheets were thermal degraded completely under the above condition. The residues amount of pristine  $\alpha$ -ZrP, Jeffamine and exfoliated  $\alpha$ -ZrP gel were 88.3%, 0.2% and 30.7%, respectively (Table S2). The pristine  $\alpha$ -ZrP was unexfoliated  $\alpha$ -ZrP. The real exfoliated  $\alpha$ -ZrP nanoplatelets could be calculated through the followed equation.

$$\frac{88.3\%}{100\%} = \frac{30.7\% - 0.2\%}{x}$$

$x$  is the weight ratio of real  $\alpha$ -ZrP nanoplatelets in per 100 g exfoliated  $\alpha$ -ZrP gel. The  $x$  was calculated to be 34.5%. So, Jeffamine in exfoliated  $\alpha$ -ZrP gel was 65.5% (1-34.5%). Then, the weight ratio of  $\alpha$ -ZrP to Jeffamine M1000 in exfoliated  $\alpha$ -ZrP gel was calculated to be 0.53 to 1 (34.5%:65.5%).

Table S1 Residuals of samples at 900 °C from TG curves

| Sample                   | Residuals at 900°C (%) |
|--------------------------|------------------------|
| Pristine $\alpha$ -ZrP   | 88.3                   |
| Exfoliated $\alpha$ -ZrP | 30.7                   |
| Jeffamine-M1000          | 0.2                    |

Table S2 Thermal parameters of PBa and its nanocomposites.

| Samples                 | $T_{initial}$ (°C) |                | $T_{max}$ (°C) |                | Char Residual at 700°C |                |
|-------------------------|--------------------|----------------|----------------|----------------|------------------------|----------------|
|                         | Air                | N <sub>2</sub> | Air            | N <sub>2</sub> | Air                    | N <sub>2</sub> |
| Pristine PBa            | 337                | 325            | 623            | 384            | 0.5                    | 34.6           |
| PBa/ $\alpha$ -ZrP-2.8% | 348                | 333            | 625            | 379            | 3.1                    | 51.4           |
| PBa/ $\alpha$ -ZrP-4.6% | 347                | 336            | 632            | 386            | 4.0                    | 54.1           |
| PBa/ $\alpha$ -ZrP-8.4% | 348                | 335            | 631            | 384            | 5.8                    | 54.0           |
| PBa/M1000-15.9%         | 291                | 295            | 346,613        | 350            | 0.6                    | 34.0           |
